# Supplementary material
Source: MDPI journal article supplement (https://www.mdpi.com/2504-5377/7/4/66)
Supplement: s1 [file s1]

# Facile Synthesis of PVP-Coated Silver Nanoparticles and Evaluation of their Physico-Chemical, Antimicrobial and Toxic Activity

Francisco N. Souza Neto <sup>1,2,\*</sup>, Leonardo A. Morais <sup>1</sup>, Luiz F. Gorup <sup>2,3,4,5,\*</sup>, Lucas S. Ribeiro <sup>2</sup>, Tassia J. Martins <sup>2</sup>,  
Thayse Y. Hosida <sup>1</sup>, Patricia Francatto <sup>2</sup>, Debora B. Barbosa <sup>1</sup>, Emerson R. Camargo <sup>2</sup> and Alberto C. B. Delbem <sup>1,\*</sup>

<sup>1</sup> Araçatuba Dental School, Department of Pediatric Dentistry and Public Health,  
São Paulo State University (UNESP), Rua José Bonifácio 1193, Araçatuba 16015-050, SP, Brazil

<sup>2</sup> Department of Chemistry, Interdisciplinary Laboratory of Electrochemistry and Ceramics (LIEC),  
Federal University of São Carlos (UFSCar), Washington Luis Highway, Km 235,  
São Carlos 13565-905, SP, Brazil; tassiajoi@gmail.com (T.J.M.)

<sup>3</sup> School of Chemistry and Food Science, Federal University of Rio Grande (FURG), Av. Italia km 8,  
Rio Grande 96203-900, RS, Brazil

<sup>4</sup> Materials Engineering, Campus Porto, Federal University of Pelotas (UFPel), Pelotas 96010-610, RS, Brazil

<sup>5</sup> Institute of Chemistry, Federal University of Alfenas (UNIFAL), Alfenas 37130-001, MG, Brazil

\* Correspondence: francisco\_nsn@yahoo.com.br (F.N.S.N.); lfgorup@gmail.com (L.F.G.);  
alberto.delbem@unesp.br (A.C.B.D.)

## Experimental

### Synthesis of Silver Nanoparticles (AgNPs)

The solutions of silver nitrate ( $\text{AgNO}_3$ ) ( $\text{AgNO}_3$ , 99.9% Sigma-Aldrich, Brazil 4.5 mmol) and PVP (PVP,  $M_w$  10,000,  $(\text{C}_6\text{H}_9\text{NO})_n$ , 99% Sigma-Aldrich, Brazil, 4.5 mmol (molar number referent to PVP monomeric unit)) were prepared separately by dissolving the respective precursors in 50 mL of anhydrous ethanol ( $\text{C}_2\text{H}_5\text{OH}$ , Synth 99.8%, Brazil). Subsequently, the reaction system was kept under reflux and constant stirring for 4 h at 80 °C (Figure S1). The experiments were carried out in order to obtain uniform particles with a narrow particle size distribution.

The experiments with different reactional conditions were carried out in a procedure similar to the one previously mentioned, and it was evaluated their effects on the size of AgNPs and their microbiological activity.

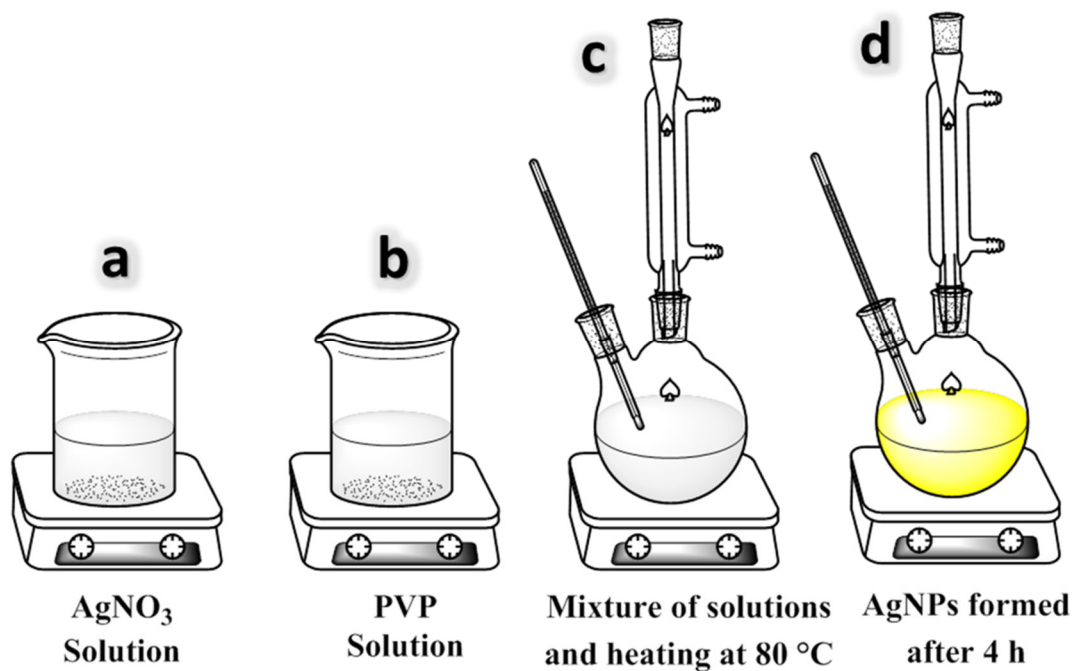

**Figure S1:** Schematic representation of synthesis of silver nanoparticles in alcoholic medium.

## Results

### UV-Vis Spectroscopy (UV-Vis)

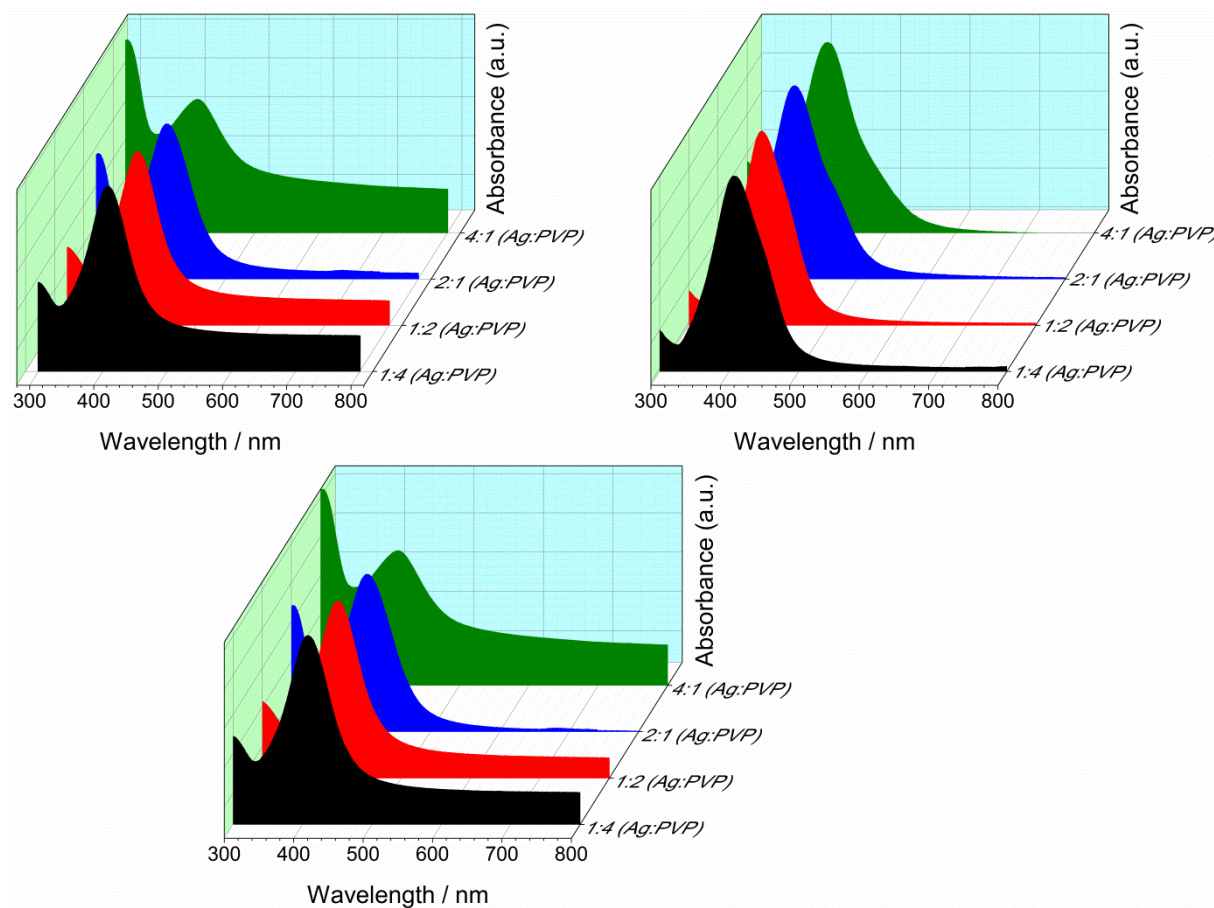

**Figure S2:** UV-Vis spectra of synthesized AgNPs at different concentrations and average molecular weights of PVP. A: average molecular weights of PVP 10K. B: average molecular weights of PVP 40K. C: average molecular weights of PVP 360K.

## X-ray Diffraction (XRD)

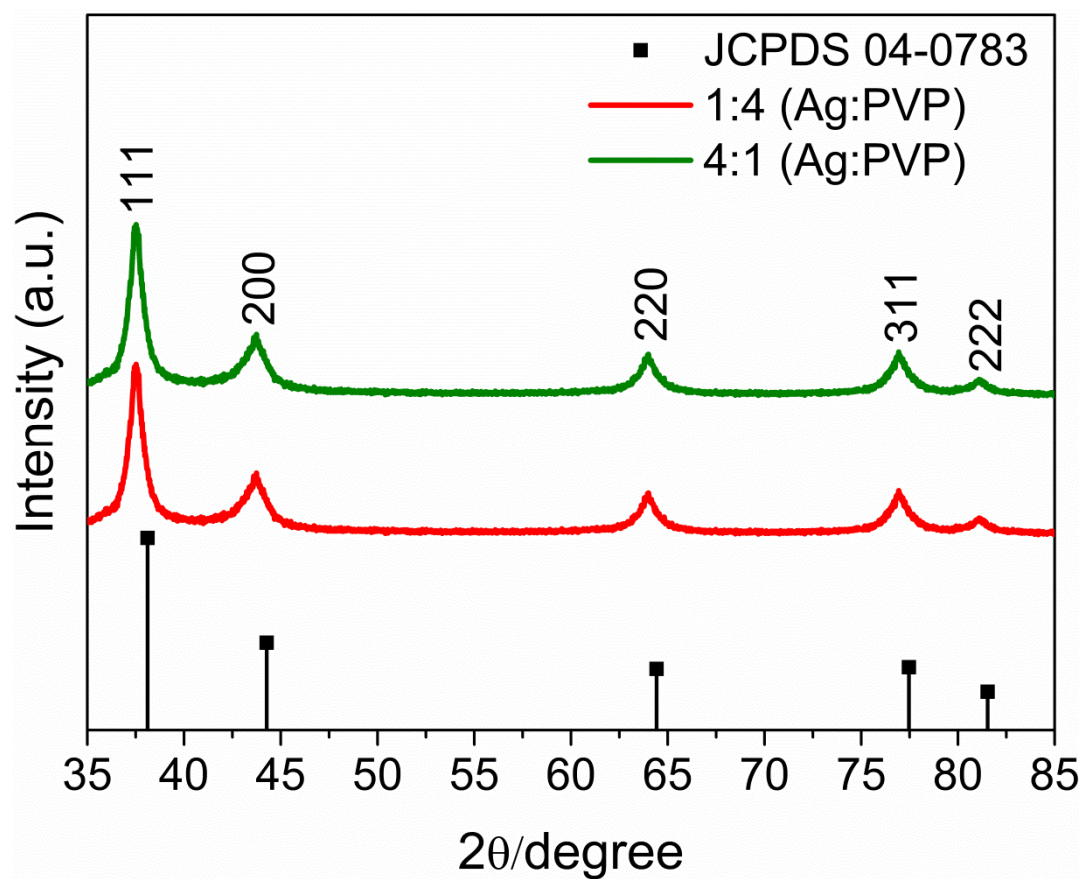

**Figure S3:** X-ray diffractograms of AgNPs at different concentrations and average molecular weights of PVP 10K.

## Scanning Electron Microscopy (SEM)

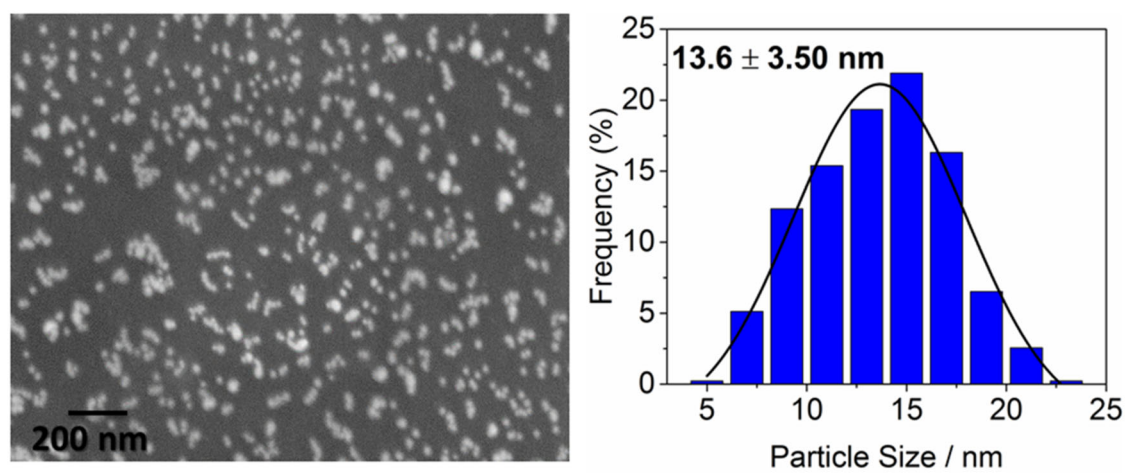

**Figure S4:** SEM micrographs of AgNPs and particle size distribution (2:1 Ag:PVP 10K).

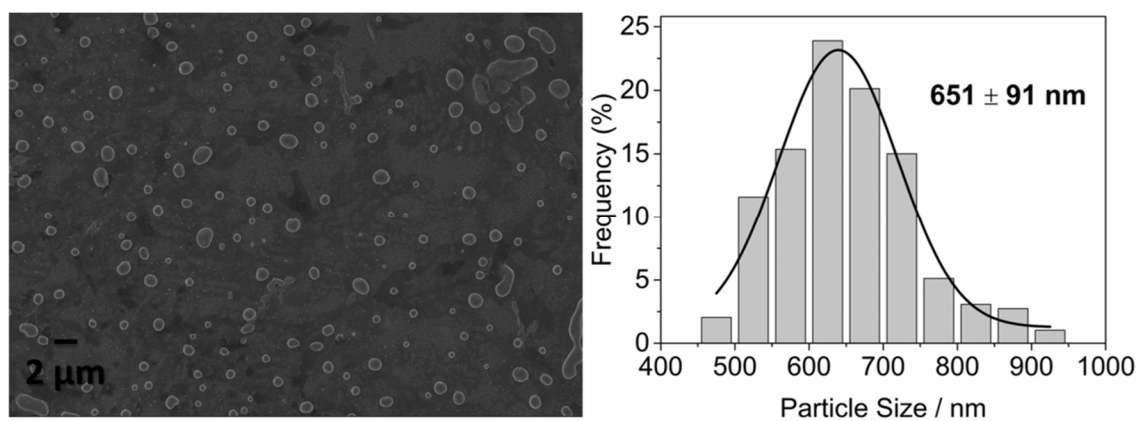

**Figure S5:** SEM micrographs of AgNPs and particle size distribution (4:1 Ag:PVP 10K).



## Dynamic Light Scattering (DLS)

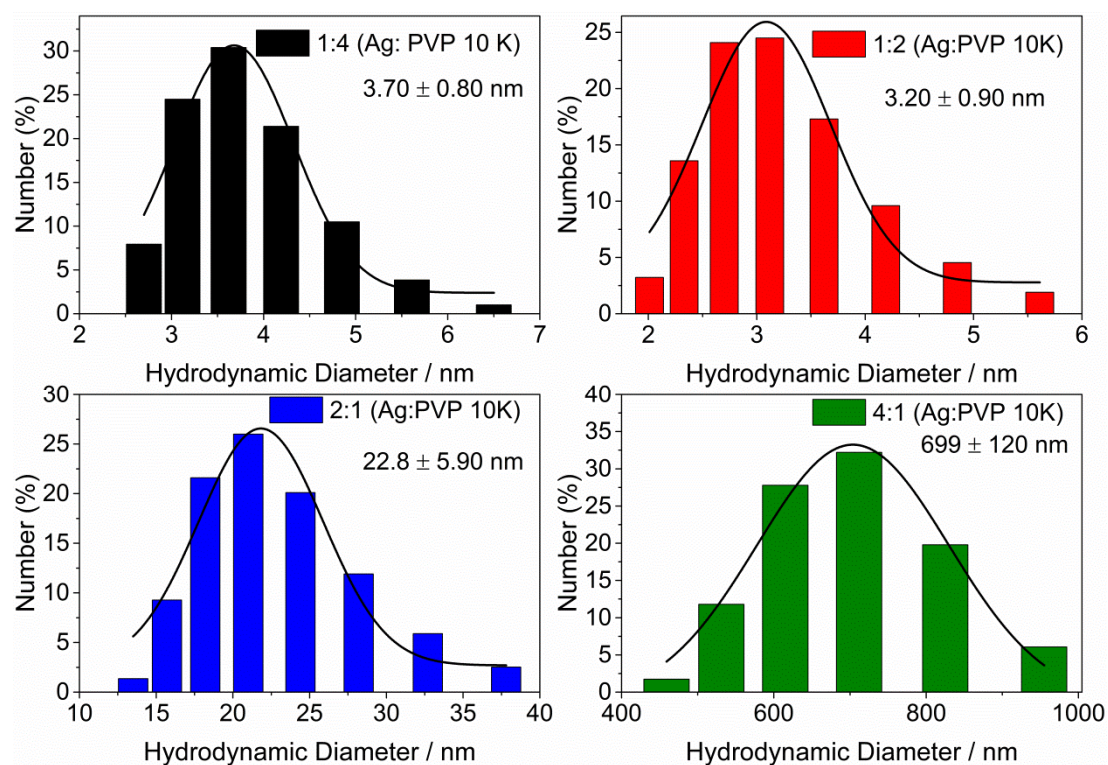

**Figure S6:** Size distribution by number (%) of hydrodynamic diameter at different concentrations and average molecular weights of PVP 10K.

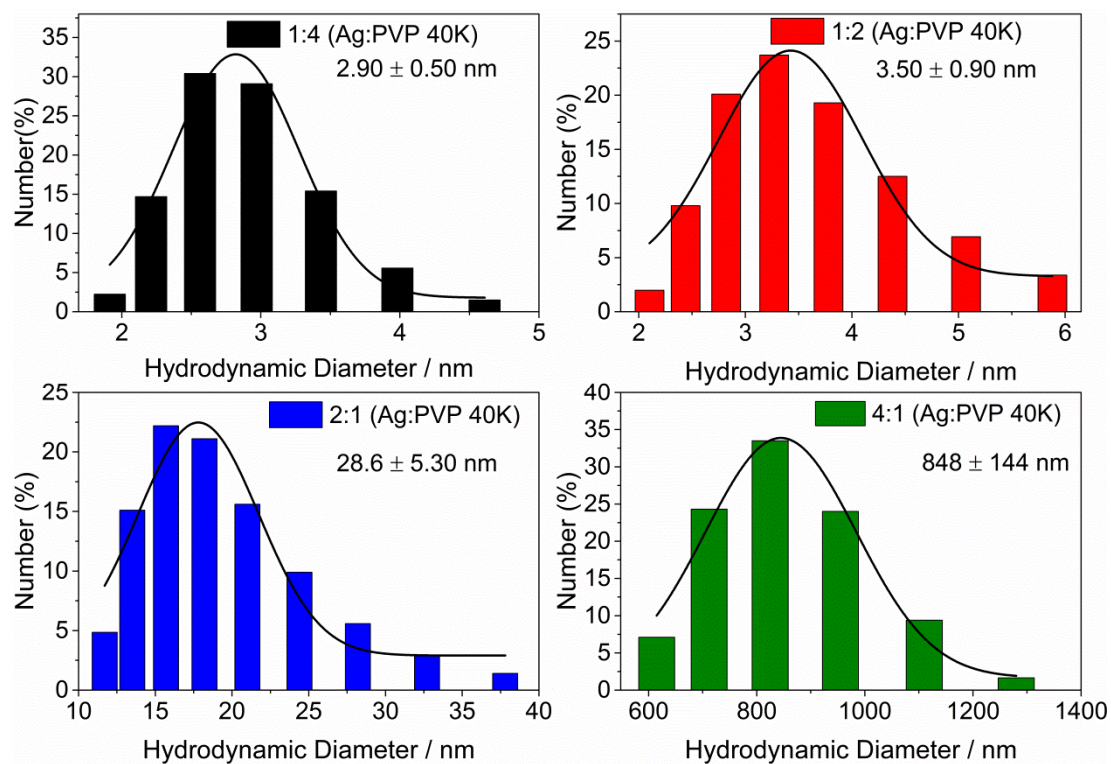

**Figure S7:** Size distribution by number (%) of hydrodynamic diameter at different concentrations and average molecular weights of PVP 40K.

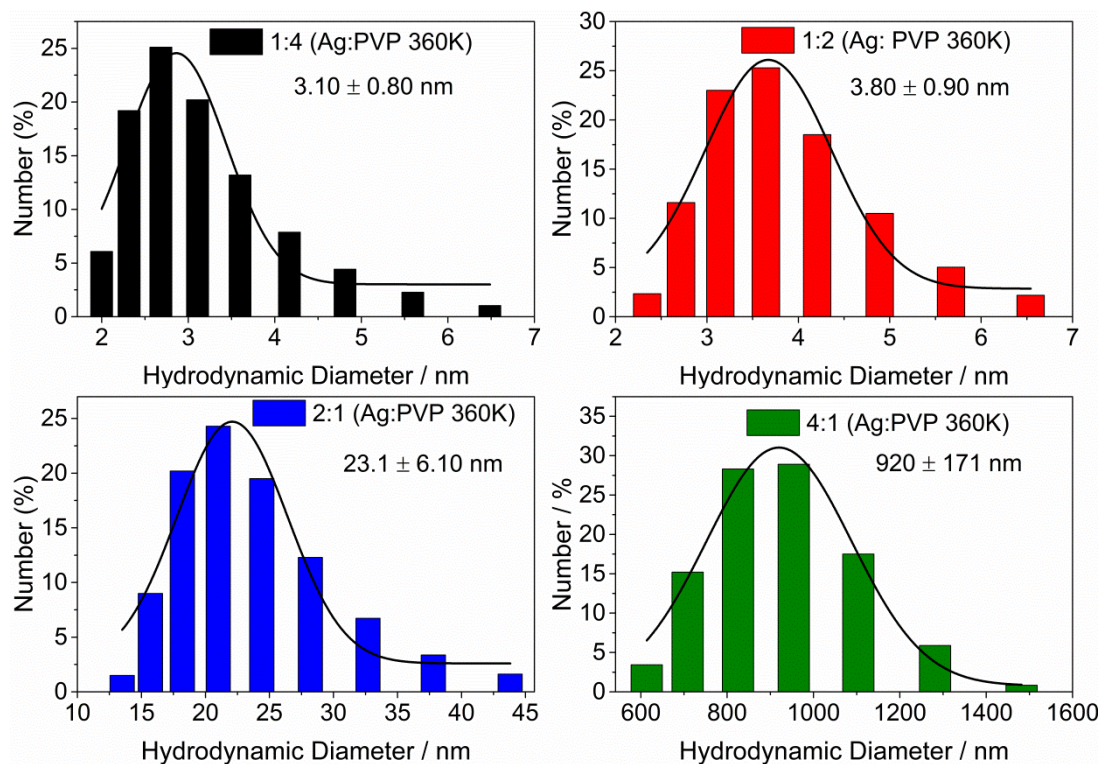

**Figure S8:** Size distribution by number (%) of hydrodynamic diameter at different concentrations and average molecular weights of PVP 360K.
